# Supplementary material for: Pharmaco‐electroencephalographic responses in the rat differ between active and inactive locomotor states
Source: PubMed Central journal article supplement — Eur J Neurosci. 2019 Apr 1;50(2):1948–71. doi: 10.1111/ejn.14373 (PMC6806018; doi:10.1111/ejn.14373), 2019-04-01
Supplement: EJN-50-1948-s001.pdf [file EJN-50-1948-s001.pdf]

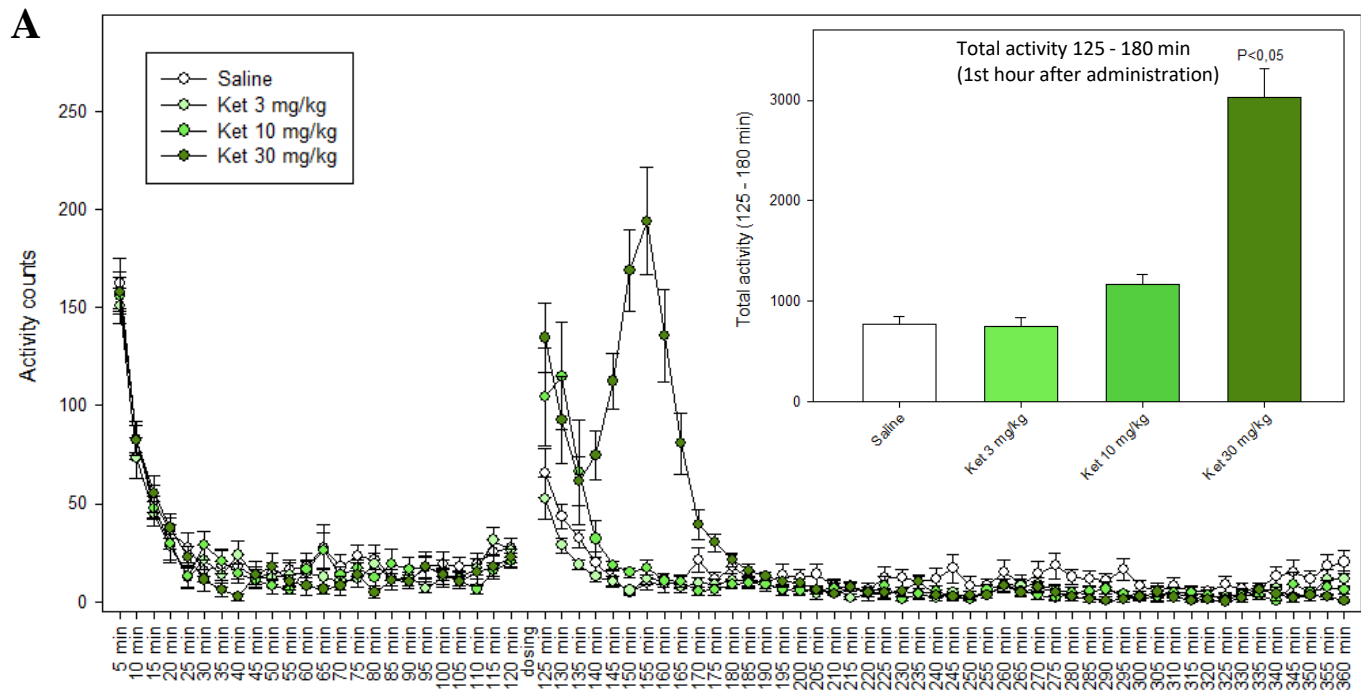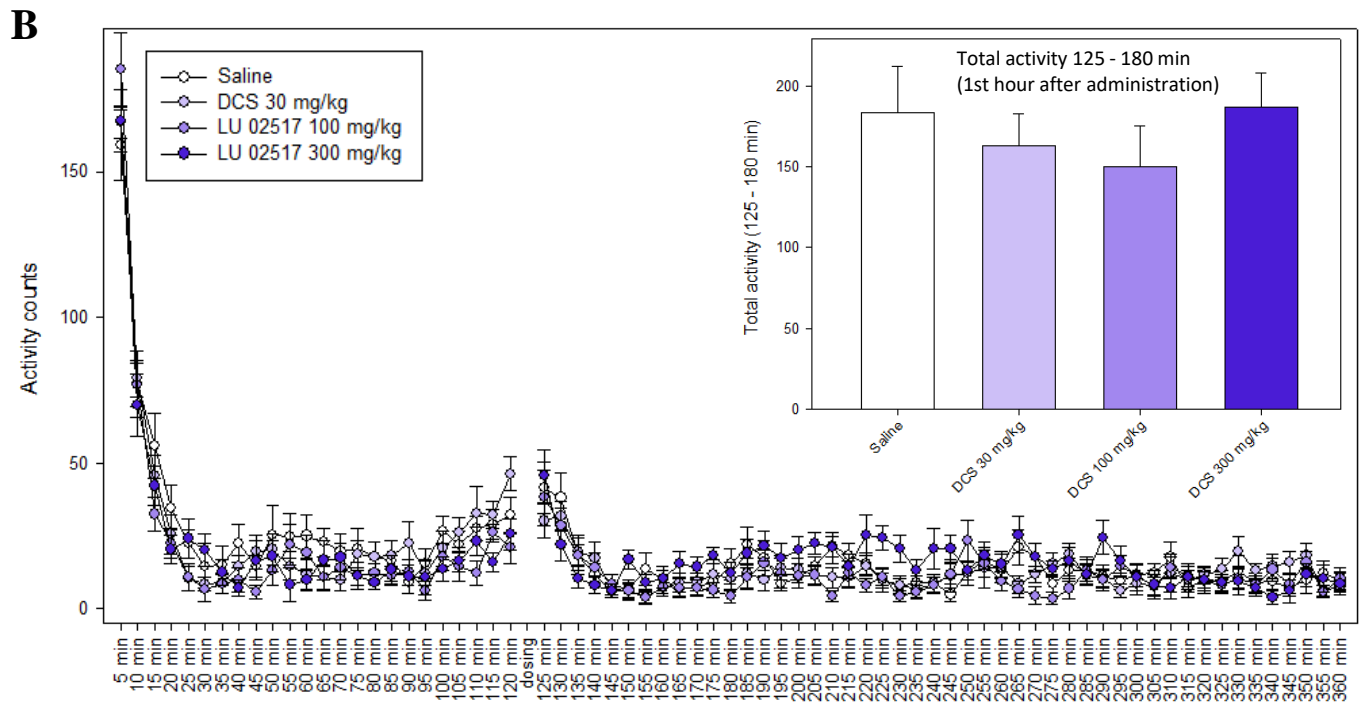

**Supporting Figure 1:** Drug-induced changes in activity level in male Sprague Dawley rats ( $n = 12$  in each drug-group,  $280 \pm 20$  g) in the dark-phase as assessed with beam-breaks (repeated breaks of the same beam excluded). Line-graphs show activity counts in five-minute-intervals, and bar-graphs show total amount of activity counts the first hour after administration. Errorbars indicate standard error of the mean. Statistics performed using Kruskal-Wallis One-Way ANOVA on ranks and Dunn's Method for multiple comparisons versus saline group (A) Effects of ketamine (Ket) on activity level. (B) Effects of d-cycloserine (DCS) on activity level. Drugs were administered after 2 hours of habituation.
