# Supplementary material for: Pharmaco‐electroencephalographic responses in the rat differ between active and inactive locomotor states
Source: PubMed Central journal article supplement — Eur J Neurosci. 2019 Apr 1;50(2):1948–71. doi: 10.1111/ejn.14373 (PMC6806018; doi:10.1111/ejn.14373), 2019-04-01
Supplement: EJN-50-1948-s002.pdf [file EJN-50-1948-s002.pdf]

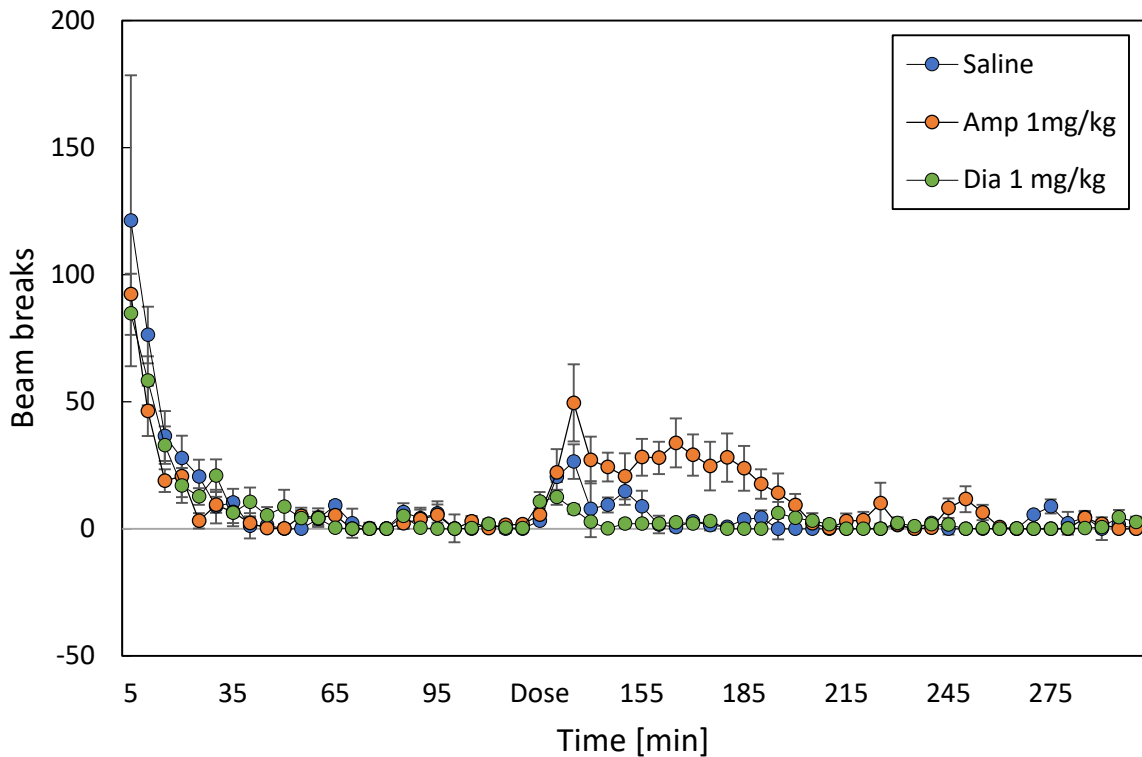

**Supporting Figure 2:** Changes in activity level induced d-amphetamine (Amp), diazepam (Dia), and saline as assessed by infrared beam breaks in male Wistar rats (n = 8 in each drug-group). Beam breaks were counted within time-intervals of 5 minutes during 5 hours. Drugs were administered after 2 hours of habituation ('Dose' indicates time of dosing).
