# Supplementary material for: Pharmaco‐electroencephalographic responses in the rat differ between active and inactive locomotor states
Source: PubMed Central journal article supplement — Eur J Neurosci. 2019 Apr 1;50(2):1948–71. doi: 10.1111/ejn.14373 (PMC6806018; doi:10.1111/ejn.14373), 2019-04-01
Supplement: EJN-50-1948-s003.pdf [file EJN-50-1948-s003.pdf]

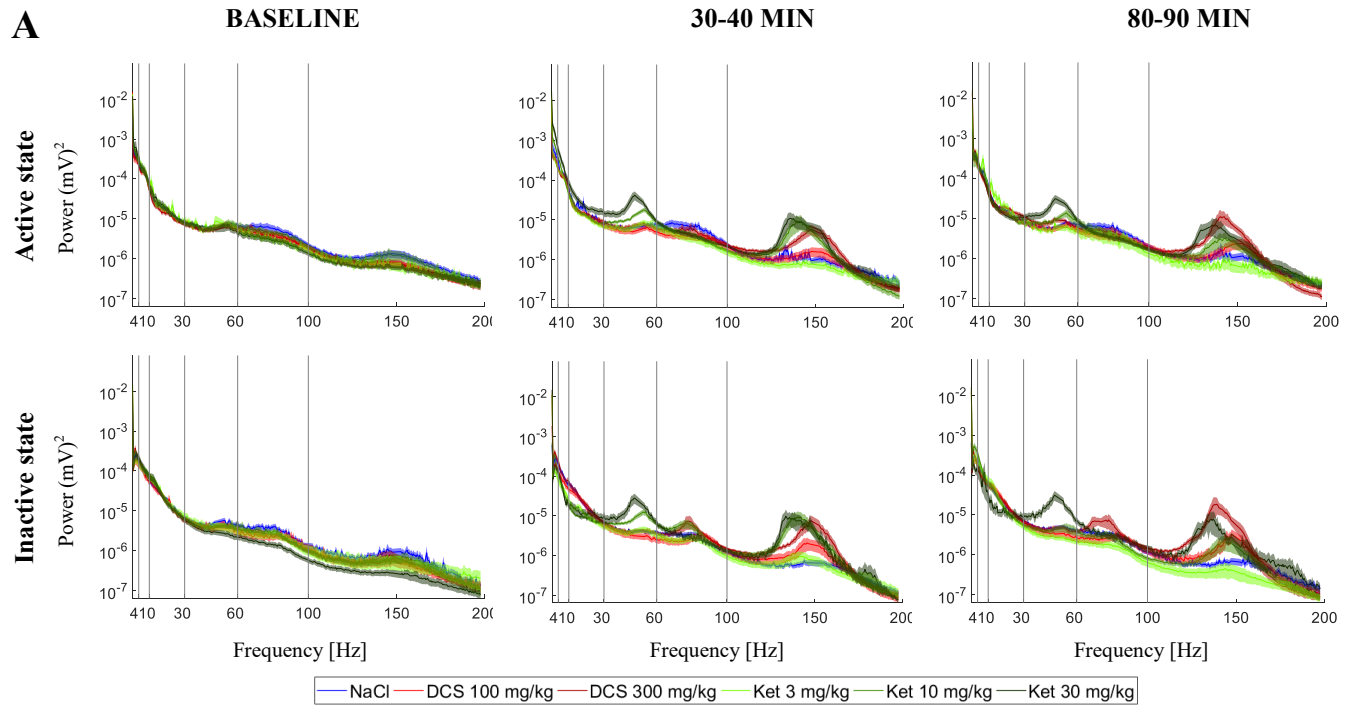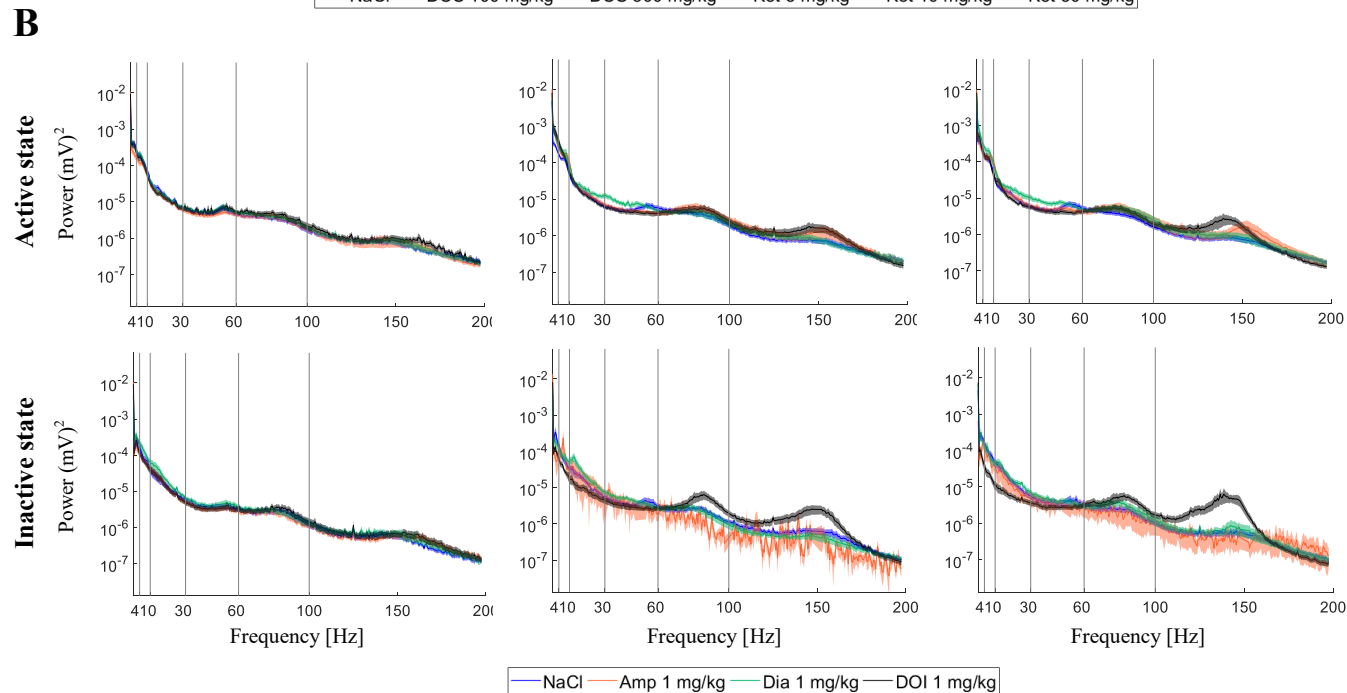

**Supporting Figure 3:** Raw power spectra from baseline (30 to 20 min before injection), 30-40 min, and 80-90 minutes after injection (columns). Standard error of the mean (SEM) given as the shaded areas above and below the graphs. **(A)** Effects of ketamine (Ket), d-cycloserine (DCS), and saline. **(B)** Effects of amphetamine (Amp), diazepam (Dia), DOI, and saline.
