# Supplementary material for: Pharmaco‐electroencephalographic responses in the rat differ between active and inactive locomotor states
Source: PubMed Central journal article supplement — Eur J Neurosci. 2019 Apr 1;50(2):1948–71. doi: 10.1111/ejn.14373 (PMC6806018; doi:10.1111/ejn.14373), 2019-04-01
Supplement: EJN-50-1948-s004.pdf [file EJN-50-1948-s004.pdf]

**DELTA****BETA****HIGH GAMMA****HFO**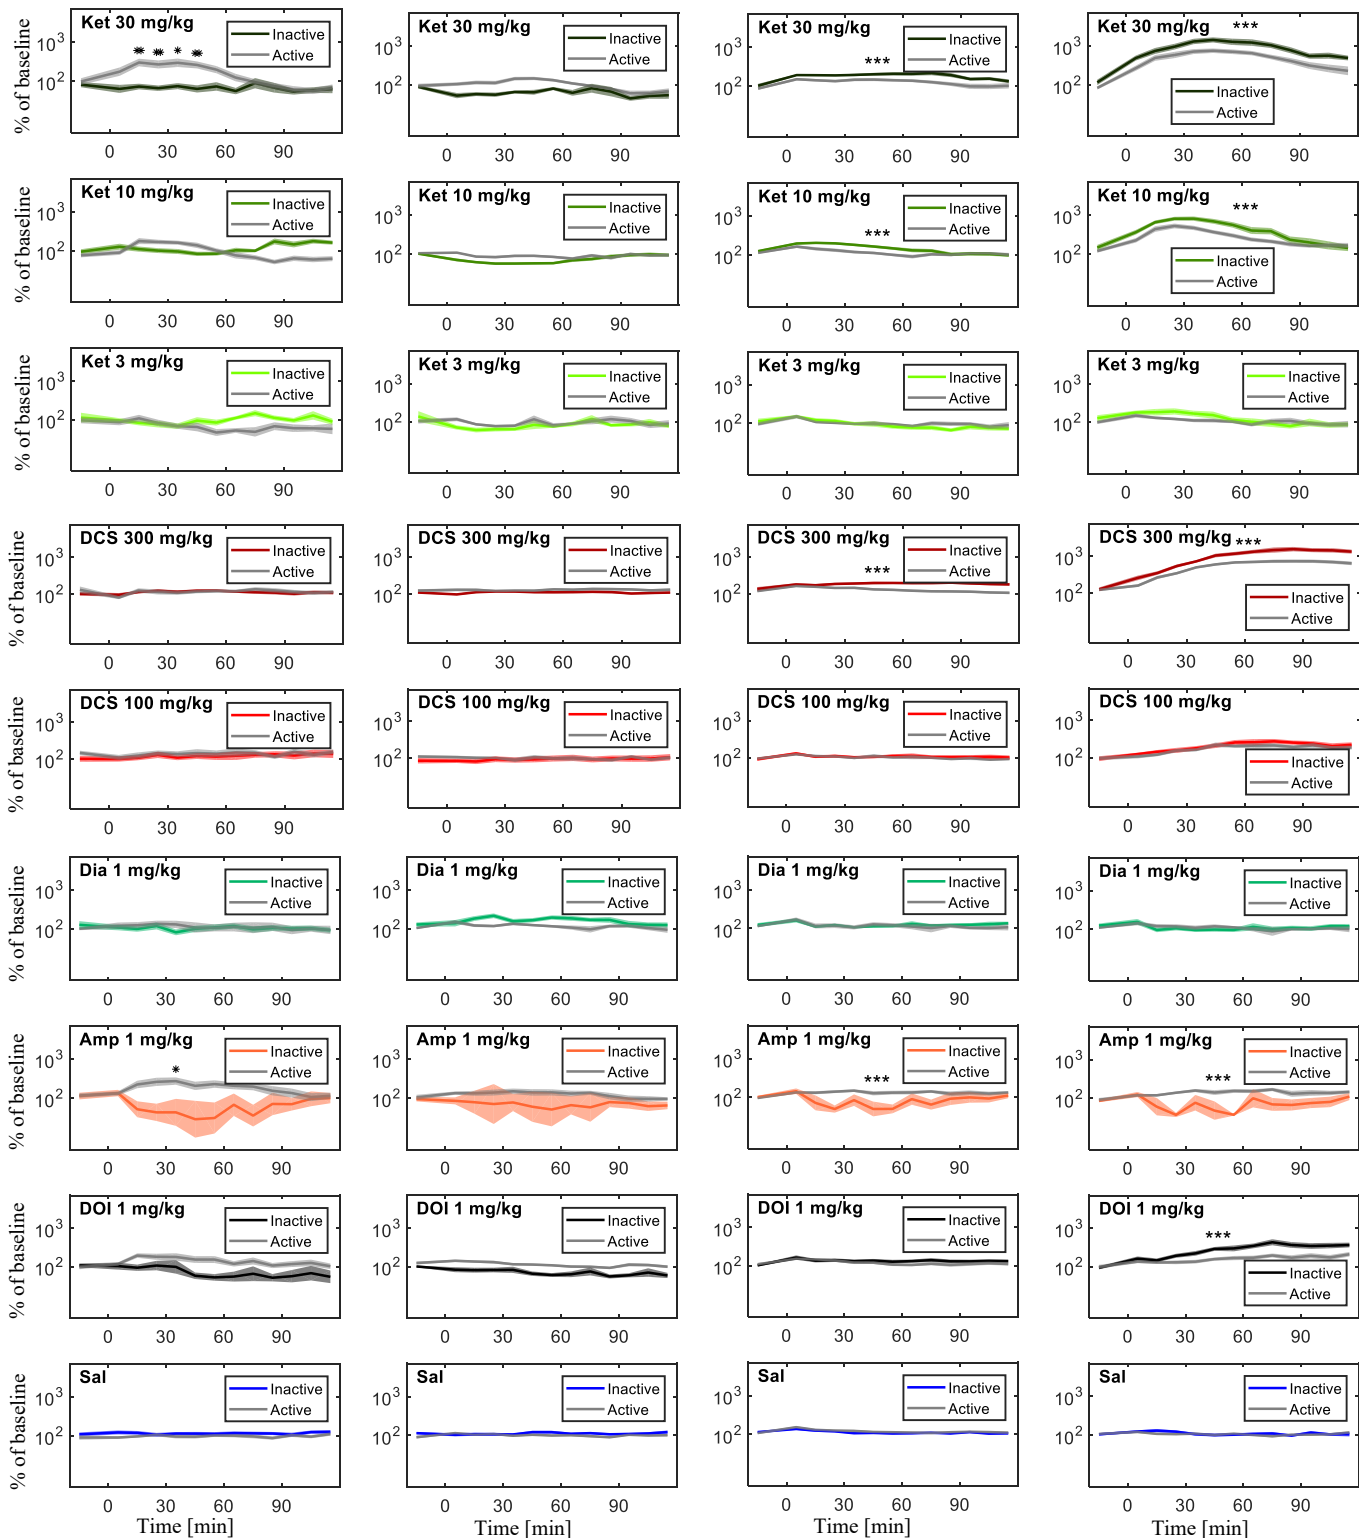

**Supporting Figure 4:** Effects of ketamine (Ket), d-cycloserine (DCS), diazepam (Dia), Amphetamine (Amp), DOI, and saline (Sal) on average baseline-normalized powers in the active and inactive states in right medial prefrontal cortex. Standard error of the mean (SEM) given as the shaded areas. Significant differences between states are marked when  $p < 0.05$  (\*), 0.01 (\*\*), or 0.001(\*\*\*). Effects of Ket 30 mg/kg and Amp delta powers are given at specific time-points as the fitted statistical model showed that dose-specific state-differences depended on time.
